# Supplementary material
Source: Springer Nature journal article supplement (https://www.springermedizin.de/resource/supplementary/12883_2010_466_MOESM1_ESM.pdf/9455494)
Supplement: MOESM1 [file 9455494]

— FM  
 ..... DPN

Questionnaire scores (adjusted by individual mean)

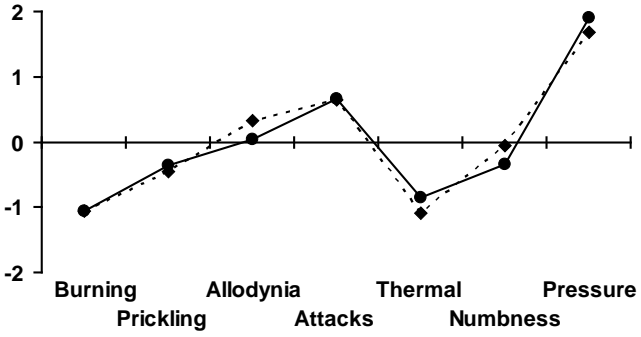

Subgroup 1  
 FM 26%  
 DPN 10%

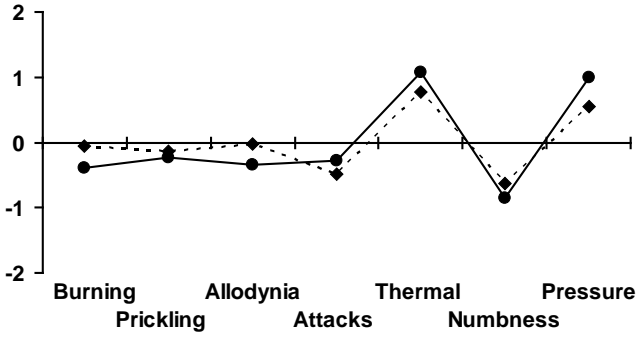

Subgroup 2  
 FM 25%  
 DPN 11%

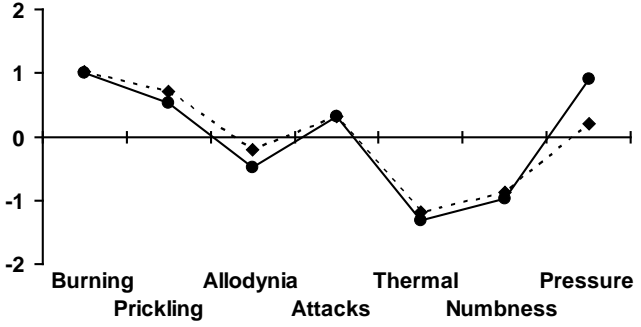

Subgroup 3  
 FM 22%  
 DPN 17%

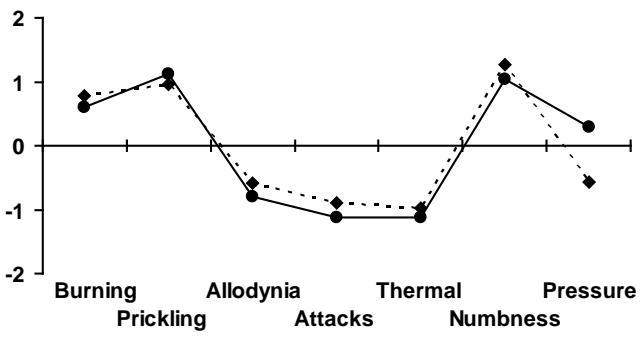

Subgroup 4  
 FM 9%  
 DPN 29%

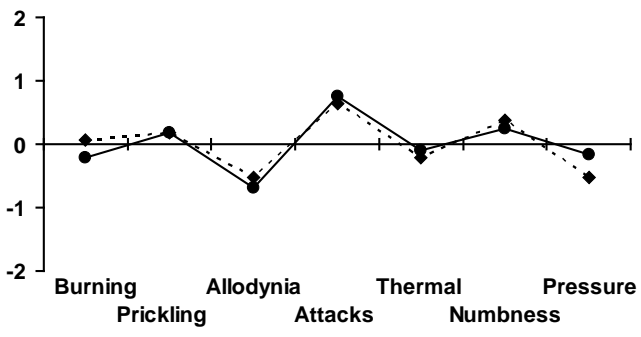

Subgroup 5  
 FM 19%  
 DPN 34%
